# Supplementary material for: Improved synthesis and hydrothermal stability of Pt/C catalysts based on size-controlled nanoparticles
Source: Royal Society of Chemistry journal article supplement (doi:10.1039/c6cy00403b), 2016-01-01
Supplement: c6cy00403b1.pdf [file c6cy00403b1.pdf]

## Improved synthesis and hydrothermal stability of Pt/C catalysts based on size-controlled nanoparticles

J. Lemus<sup>a</sup>, J. Bedia<sup>a</sup>, L. Calvo<sup>a\*</sup>, I.L. Simakova<sup>b</sup>, D.Y. Murzin<sup>c</sup>, B.J.M. Etzold<sup>d</sup>,  
J.J. Rodriguez<sup>a</sup>, M.A. Gilarranz<sup>a</sup>

### Supporting information

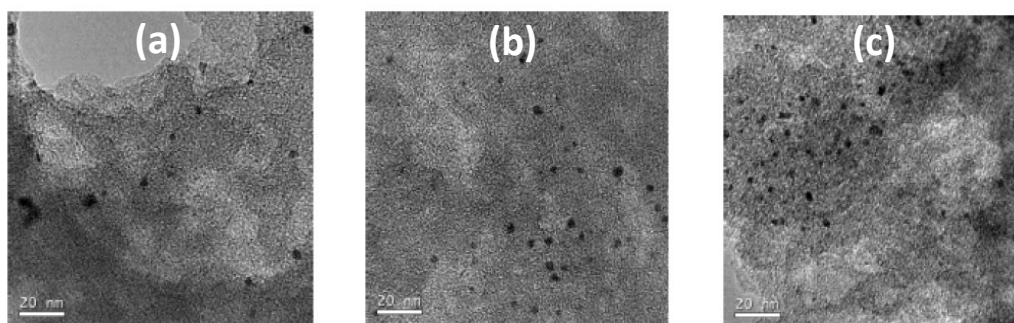

**Fig. S1.** TEM images of catalysts prepared by a) *ex situ* b) *in situ 1* and c) *in situ 2* methods at PVP/Pt = 100 and NaBH<sub>4</sub>/Pt = 10; (samples 2, 4 and 6, respectively). Bar length: 20 nm.

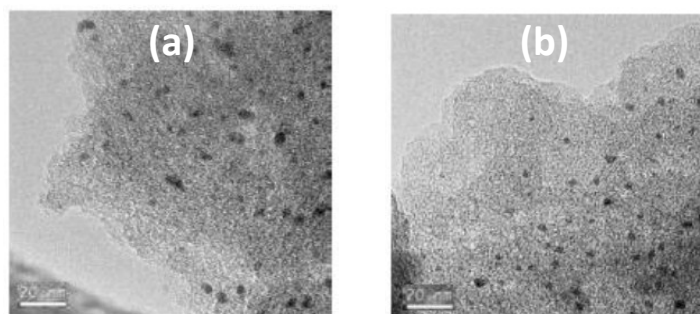

**Fig. S2.** TEM images of catalysts prepared by a) *in situ 1* and b) *in situ 2* methods at PVP/Pt = 10 and NaBH<sub>4</sub>/Pt = 26; (samples 7 and 8, respectively). Bar length: 20 nm.

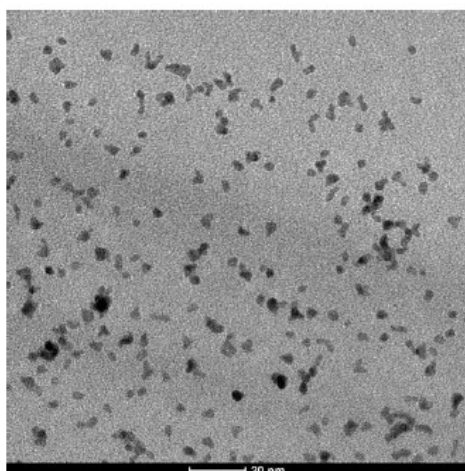

**Figure S3.** Representative TEM image of sample Pt-NaBH<sub>4</sub>10-PVP10.

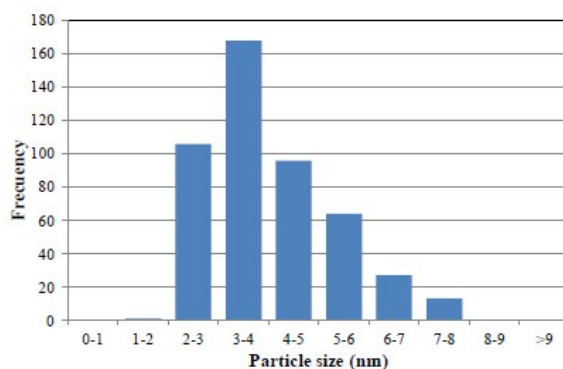

**Figure S4.** Nanoparticle size distribution for sample Pt-NaBH<sub>4</sub>10-PVP10.

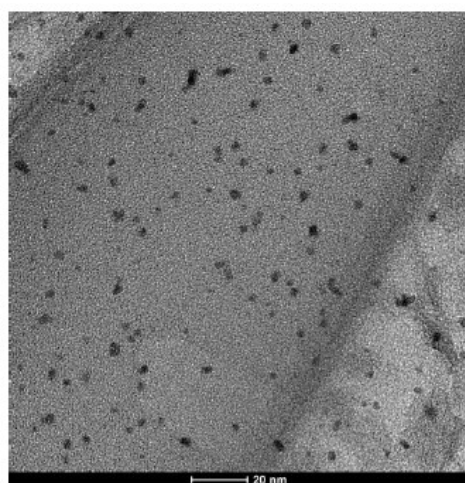

**Figure S5.** Representative TEM image of sample Pt-NaBH<sub>4</sub>10-PVP100.

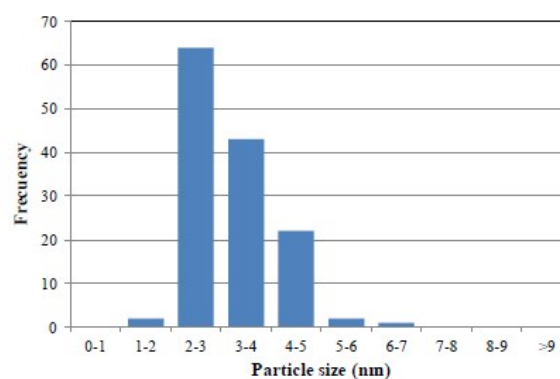

**Figure S6.** Nanoparticle size distribution for sample Pt-NaBH<sub>4</sub>10-PVP100.

**Table S1.** Pt NPs synthesis conditions, number average diameter, surface average diameters and standard deviation.

| Sample                         | Reducing agent    | NaBH <sub>4</sub> /metal (mol/mol) | PVP/Metal (mol/mol) | d <sub>s</sub> (nm) | d <sub>n</sub> (nm) | σ (nm)               |
|--------------------------------|-------------------|------------------------------------|---------------------|---------------------|---------------------|----------------------|
| Pt-NaBH <sub>4</sub> 10-PVP10  | NaBH <sub>4</sub> | 10                                 | 10                  | 4.82                | 4.00±0.12*          | 1.18* < 1.26 < 1.34* |
| Pt-NaBH <sub>4</sub> 10-PVP100 | NaBH <sub>4</sub> | 10                                 | 100                 | 3.63                | 3.17±0.14*          | 0.75* < 0.84 < 0.95* |

$$d_n = \text{number average diameter} = \frac{\sum n_i \cdot d_i}{\sum n_i}$$

$$d_s = \text{surface average diameter} = \frac{\sum n_i \cdot d_i^3}{\sum n_i \cdot d_i^2}$$

$$\sigma = \text{standard deviation}$$

\* 95% confidence intervals calculated using MATLAB software

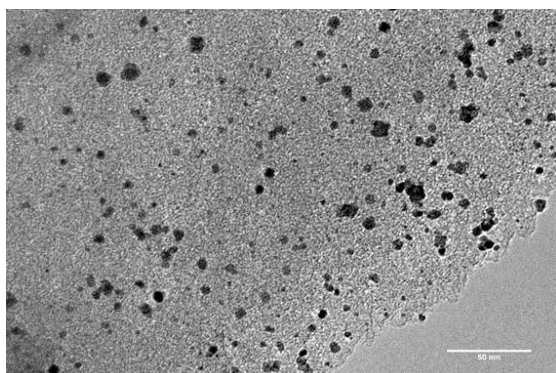

**Figure S7.** Representative TEM image of a sample synthesized by chemical reduction with  $\text{NaBH}_4$  without PVP.

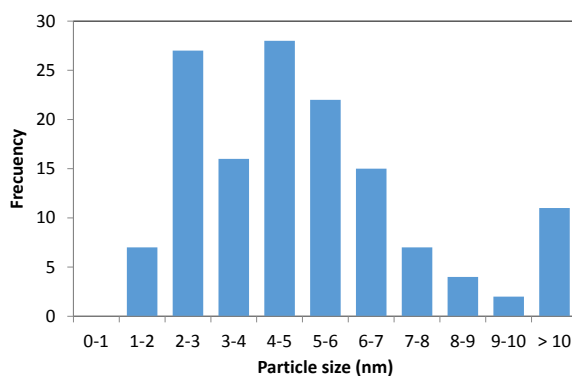

**Figure S8.** Nanoparticle size distribution for a sample synthesized by chemical reduction with  $\text{NaBH}_4$  without PVP.

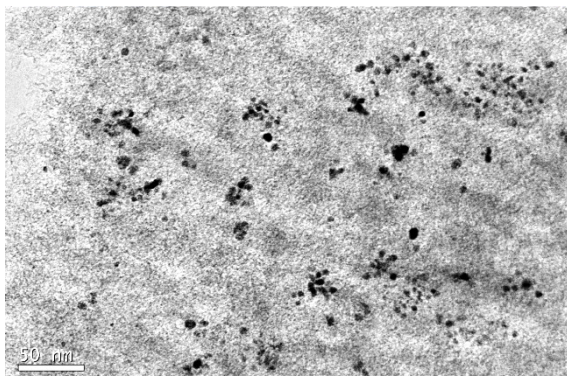

**Figure S9.** Representative TEM image of a sample synthesized by incipient wetness impregnation.

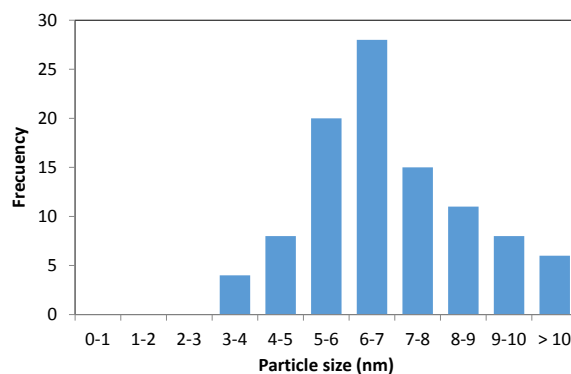

**Figure S10.** Nanoparticle size distribution for a sample synthesized by incipient wetness impregnation.

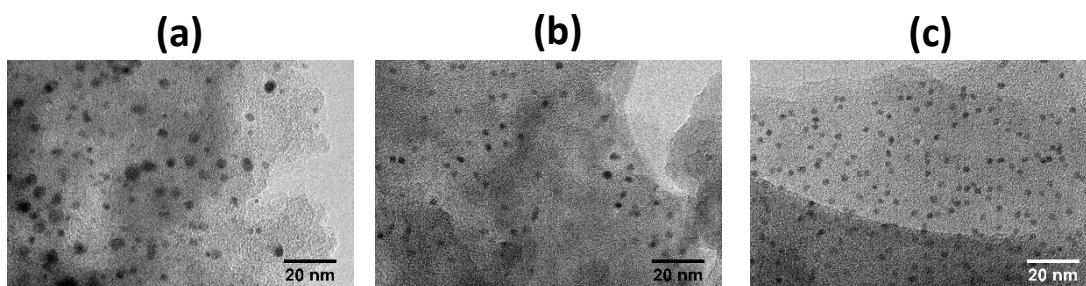

**Fig S11.** Representative TEM images of the samples synthesized by in situ routes and subjected to pyrolysis at  $500\text{ }^\circ\text{C}$  (a) 3: *in situ* 1, PVP/Pt = 10; (b) 4: *in situ* 1, PVP/Pt = 100; and (c) 6 *in situ* 2, PVP/Pt = 100.
